# Supplementary material for: Hypoxia negates hyperglycaemia-induced chemo-resistance in breast cancer cells: the role of insulin-like growth factor binding protein 2
Source: PubMed Central journal article supplement (PMC5650368; doi:10.18632/oncotarget.20287), 2017-08-16
Supplement: oncotarget-08-74635-s001.pdf [file oncotarget-08-74635-s001.pdf]

## Hypoxia negates hyperglycaemia-induced chemo-resistance in breast cancer cells: the role of insulin-like growth factor binding protein 2

### SUPPLEMENTARY MATERIALS

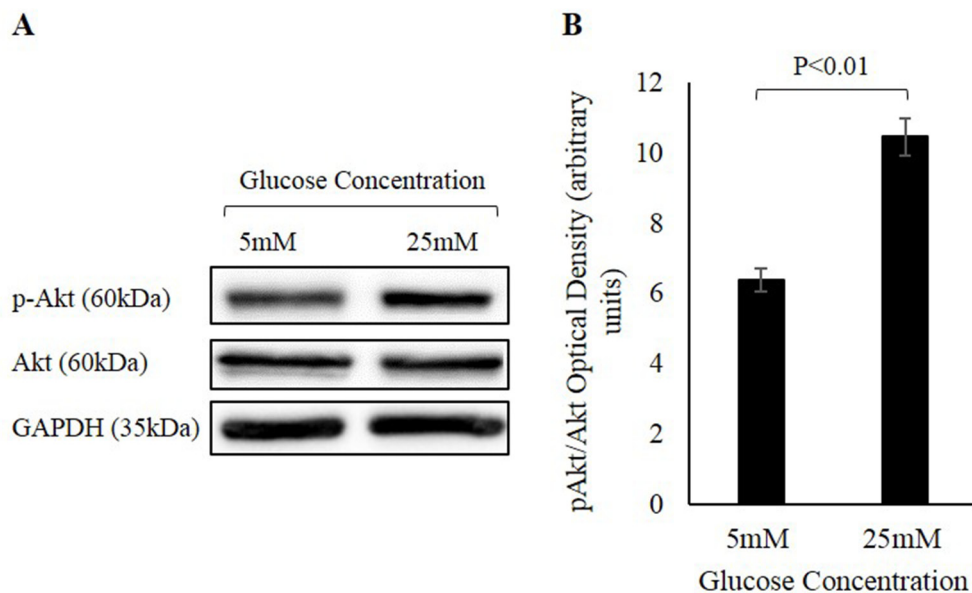

**Supplementary Figure 1: The effect of different glucose levels on Akt.** (A) MCF-7 cells were treated in 5mM and 25mM glucose and the levels of Akt phosphorylation was identified by Western immunoblotting. (B) The densitometry measurements of pAkt/Akt in different glucose levels. The graphs represent the mean±SEM of three independent repeats.

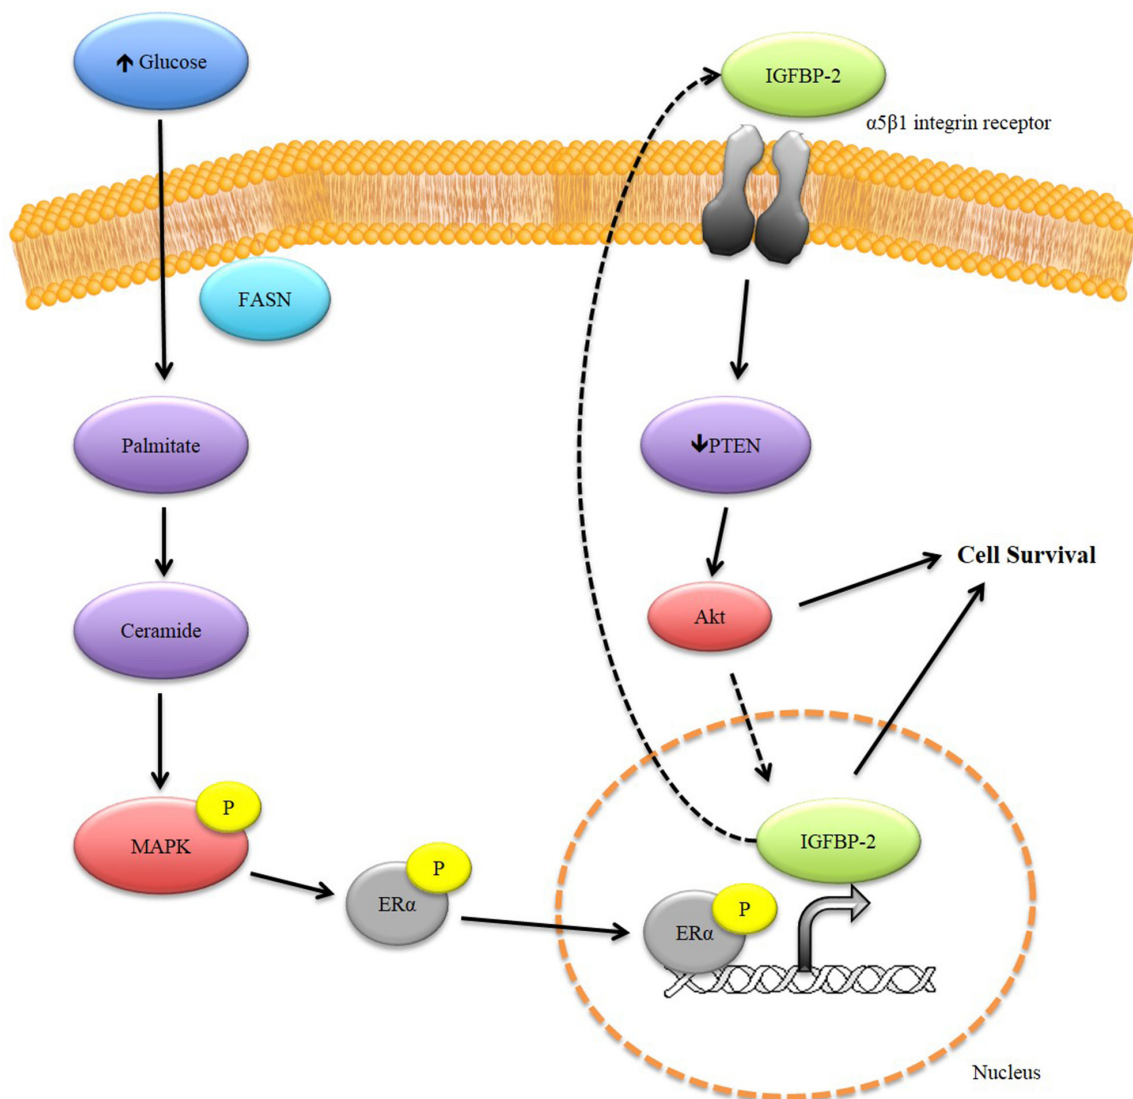

**Supplementary Figure 2: Illustration of hypothesised pathway by which IGFBP-2 affects the response of breast cancer cells to chemotherapy in high levels of glucose.** Lipid metabolism is regulated by FASN, which converts glucose to palmitate. This conversion triggers subsequent signalling cascades involving ER $\alpha$  being phosphorylated and translocated to the nucleus where it acts as a transcriptionally promotes the expression of IGFBP-2. IGFBP-2 being secreted outside the cells acts in a positive feedback loop promoting more induction of IGFBP-2.
